# Supplementary material for: SARS-CoV-2 T Cell Responses Elicited by COVID-19 Vaccines or Infection Are Expected to Remain Robust against Omicron
Source: MDPI journal article supplement (doi:10.3390/v14010079), 2022-01-02
Supplement: s1 [file s1]

## SUPPLEMENTARY TABLES

**Table S1.** CD8<sup>+</sup> T cell epitopes harboring Omicron mutations that are predicted to become non-binders. NetMHCpan-4.1 was employed for predicting peptide-HLA binding using the default parameters.

| No. | Epitope     | HLA     | Mutation(s)             | VOCs in addition to Omicron |
|-----|-------------|---------|-------------------------|-----------------------------|
| 1   | FCNDPFLGVYY | A*01:01 | Y145D                   | -                           |
| 2   | YYHKNNKSW   | A*24:02 | Y145D                   | -                           |
| 3   | YGFQPTNGV   | B*51:01 | G496S<br>Q498R<br>N501Y | -                           |
| 4   | QIAPGQTGK   | A*68:01 | K417N                   | Beta                        |
| 5   | SPRRARSV    | B*07:02 | P681H                   | Alpha                       |
| 6   | SPRRARVA    | B*07:02 | P681H                   | Alpha                       |

**Table S2.** CD4<sup>+</sup> T cell epitopes harboring Omicron mutations that are predicted to become non-binders. NetMHCpanII-4.0 was employed for predicting peptide-HLA binding using the default parameters.

| No. | Epitope         | HLA                       | Mutation(s)             | VOCs in addition to Omicron |
|-----|-----------------|---------------------------|-------------------------|-----------------------------|
| 1   | CVADYSVLYNSASF  | DQA1*01:01/<br>DQB1*05:03 | S371L<br>S373P<br>S375F | -                           |
| 2   | TQLNRALTGIAVEQD | DQB1*04:02                | N764K                   | -                           |
| 3   | NLLLQYGSFCTQLNR | DQA1*01:01/<br>DQB1*05:03 | N764K                   | -                           |
| 4   | CAQKFNGLTVPPLL  | DQB1*06:02                | N856K                   | -                           |

**Table S3.** Summary of SARS-CoV-2 T cell epitopes affected by mutations in other VOCs. NetMHCpan-4.1 and NetMHCpanII-4.0 were employed for predicting peptide-HLA binding using the default parameters.

| No. | VOC   | Type             | Lost due to deletion(s) | Predicted HLA binder(s) | Predicted HLA non-binder(s) |
|-----|-------|------------------|-------------------------|-------------------------|-----------------------------|
| 1   | Alpha | CD8 <sup>+</sup> | 6                       | 8                       | 2                           |
|     |       | CD4 <sup>+</sup> | 6                       | 9                       | 0                           |
| 2   | Beta  | CD8 <sup>+</sup> | 2                       | 8                       | 1                           |
|     |       | CD4 <sup>+</sup> | 4                       | 13                      | 0                           |
| 3   | Gamma | CD8 <sup>+</sup> | 0                       | 13                      | 2                           |
|     |       | CD4 <sup>+</sup> | 0                       | 15                      | 0                           |
| 4   | Delta | CD8 <sup>+</sup> | 2                       | 8                       | 2                           |
|     |       | CD4 <sup>+</sup> | 1                       | 10                      | 0                           |
